# Supplementary material
Source: PubMed Central journal article supplement (PMC4049606)

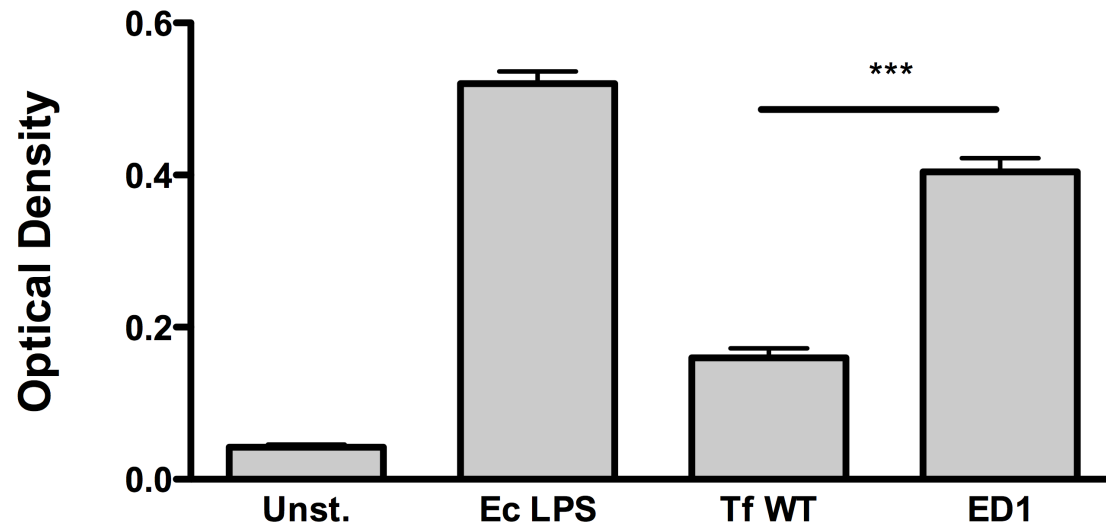

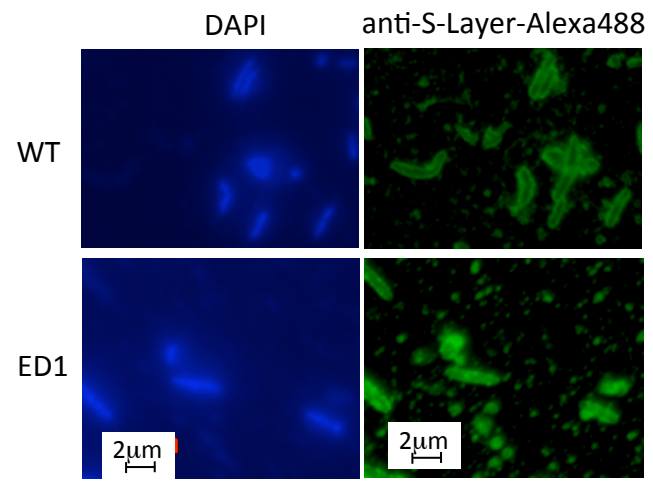

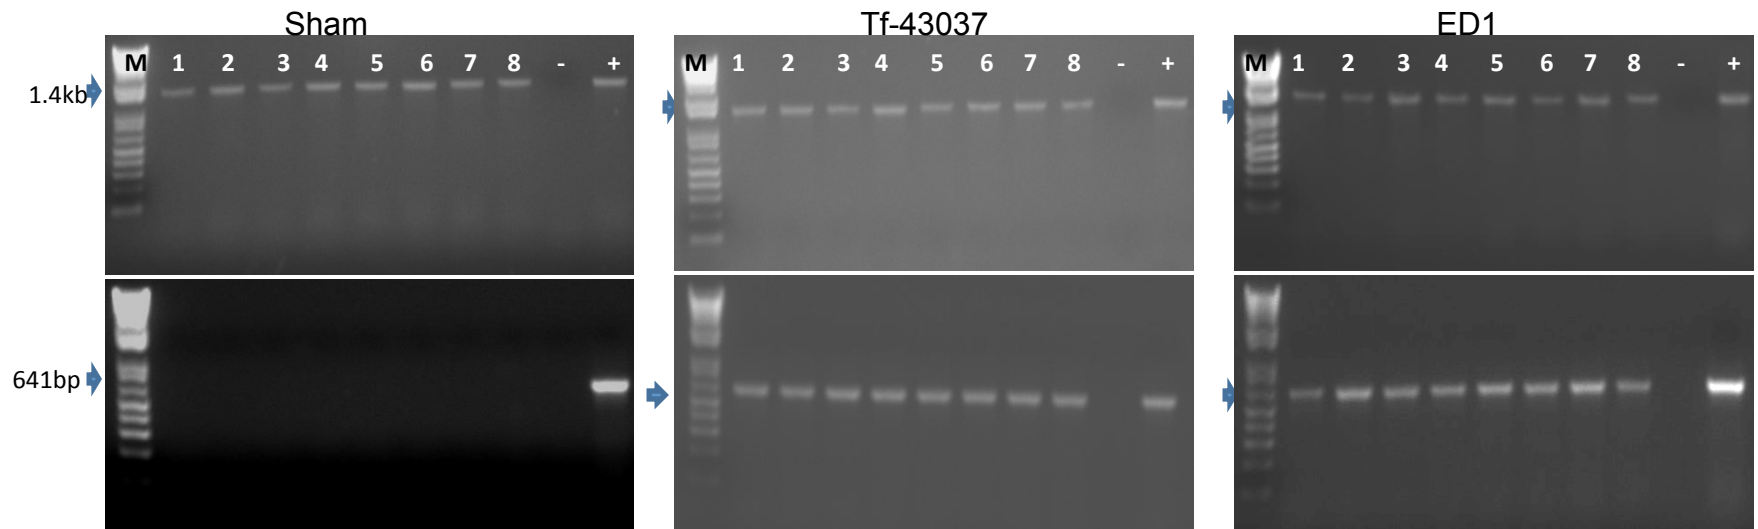

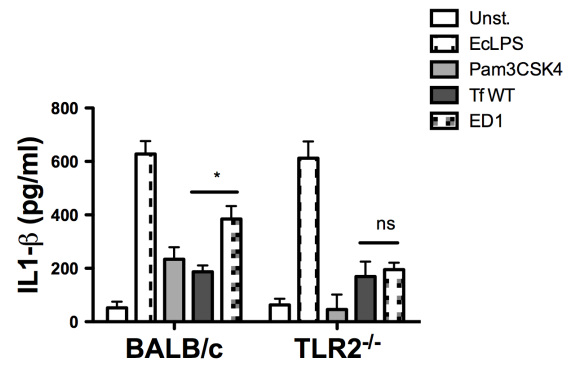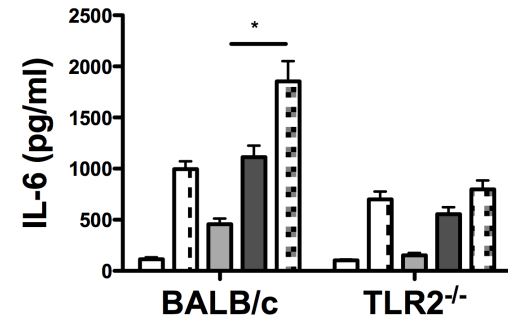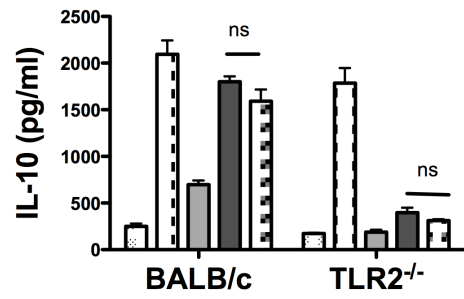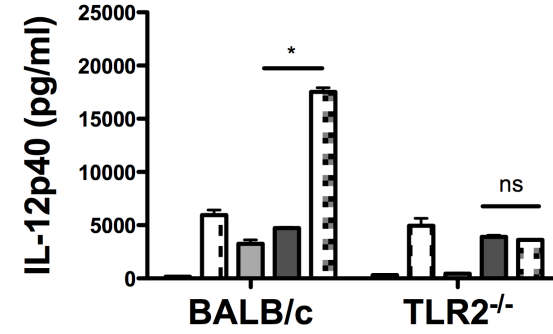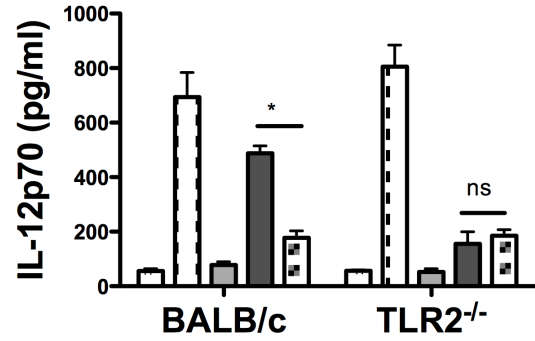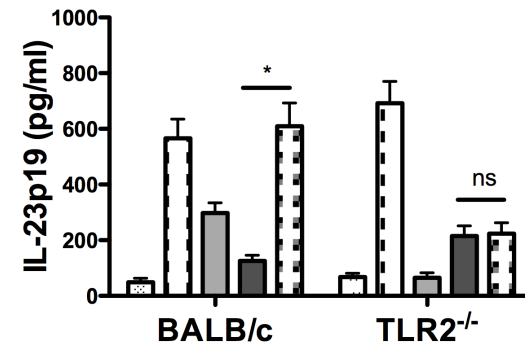

Supplement: NIHMS58968-supplement-supp_figs.pdf [file NIHMS58968-supplement-supp_figs.pdf]
